# Supplementary material
Source: Springer Nature journal article supplement (https://www.springermedizin.de/resource/supplementary/13020_2013_213_MOESM3_ESM.pdf/9641220)

Fold changes in cell viability

● J82 cells  
○ UROtsa cells

No  
treatment

7

9

11

13

15

Dilution (x1,000)

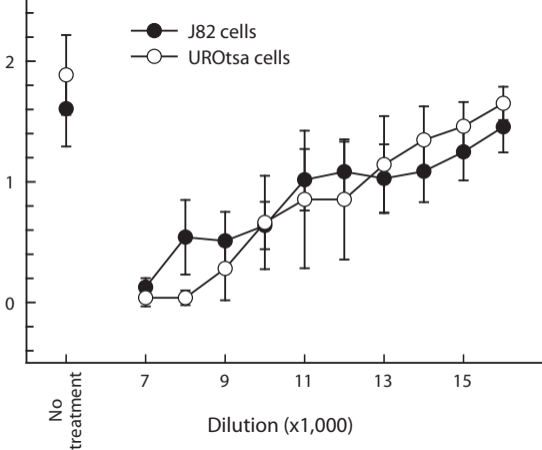

Supplement: MOESM3 [file 9641220]
